# Supplementary material for: Molecular characterization of β-lactamase genes in clinical isolates of carbapenem-resistant Acinetobacter baumannii
Source: PubMed Central journal article supplement (PMC5691885; doi:10.1186/s12941-017-0248-3), 2017-11-16
Supplement: 12941_2017_248_MOESM1_ESM.pdf [file 12941_2017_248_MOESM1_ESM.pdf]

**S1 Table.** Quality control (QC) organisms used in this study.

| <b>Organism (Strain ID)</b>                | <b>Used for Resistance Gene (in this study)</b> |
|--------------------------------------------|-------------------------------------------------|
| <i>Acinetobacter baumannii</i> ATCC-19606  | OXA-51                                          |
| <i>Acinetobacter baumannii</i> ATCC-17978  | OXA-51                                          |
| <i>Escherichia coli</i> ATCC-BAA-2452      | NDM-1                                           |
| <i>Escherichia coli</i> NCTC 13476         | IMP                                             |
| <i>Klebsiella pneumoniae</i> ATCC-BAA-2146 | NDM-1                                           |
| <i>Klebsiella pneumoniae</i> ATCC-BAA-1705 | KPC                                             |
| <i>Klebsiella pneumoniae</i> NCTC          | VIM                                             |
| <i>Enterobacter cloacae</i> NCTC 13464     | CTX-M                                           |
