# Supplementary material for: Molecular characterization of β-lactamase genes in clinical isolates of carbapenem-resistant Acinetobacter baumannii
Source: PubMed Central journal article supplement (PMC5691885; doi:10.1186/s12941-017-0248-3), 2017-11-16
Supplement: 12941_2017_248_MOESM2_ESM.pdf [file 12941_2017_248_MOESM2_ESM.pdf]

**S2 Table.** Primer sequences used for *A. baumannii* in present study

| Primer Name | Sequence               | Annealing Temp (°C) | Target Gene(s)                    | Reference  |
|-------------|------------------------|---------------------|-----------------------------------|------------|
| OXA-51-like | TAATGCTTTGATCGGCCTTG   | 52                  | <i>bla</i> <sub>OXA-51-like</sub> | 1          |
|             | TGGATTGCACTTCATCTTGC   |                     |                                   |            |
| OXA-23-like | GATCGGATTGGAGAACCAGA   | 52                  | <i>bla</i> <sub>OXA-23-like</sub> | 1          |
|             | ATTTCTGACCGCATTTCAT    |                     |                                   |            |
| OXA-24-like | GTAATAATCAAAGTTGTGAA   | 50                  | <i>bla</i> <sub>OXA-24-like</sub> | 2          |
|             | TTCCCTAACATGAATTTGT    |                     |                                   |            |
| OXA-40-like | GGTTAGTTGGCCCCCTTAAA   | 52                  | <i>bla</i> <sub>OXA-40-like</sub> | 1          |
|             | AGTTGAGCGAAAAGGGGATT   |                     |                                   |            |
| OXA-58-like | AAGTATTGGGGCTTGTGCTG   | 52                  | <i>bla</i> <sub>OXA-58-like</sub> | 1          |
|             | CCCCTCTGCGCTCTACATAC   |                     |                                   |            |
| IMP         | GGAATAGAGTGGCTTAATTCTC | 52                  | <i>bla</i> <sub>IMP</sub>         | 1          |
|             | CAAACCACTACGTTATCT     |                     |                                   |            |
| VIM         | GATGGTGTGGTTCGCATA     | 52                  | <i>bla</i> <sub>VIM</sub>         | 1          |
|             | CGAATGCGCAGCACCAG      |                     |                                   |            |
| GIM         | TCGACACACCTTGGTCTGAA   | 52                  | <i>bla</i> <sub>GIM</sub>         | 1          |
|             | AACTTCCAACCTTGGCCATGC  |                     |                                   |            |
| SPM         | AAAATCTGGGTACGCAAACG   | 52                  | <i>bla</i> <sub>SPM</sub>         | 1          |
|             | ACATTATCCGCTGGAACAGG   |                     |                                   |            |
| SIM         | TACAAGGGATTTCGGCATCG   | 52                  | <i>bla</i> <sub>SIM</sub>         | 1          |
|             | TAATGGCCCGTTCCCATGTG   |                     |                                   |            |
| DIM         | TCTATTCAGCTTGTCTTCGC   | 52                  | <i>bla</i> <sub>DIM</sub>         | 3          |
|             | TGTTAGAGGCTGTCTCAGCC   |                     |                                   |            |
| NDM-1       | GGTTTGGCGATCTGGTTTTTC  | 52                  | <i>bla</i> <sub>NDM-1</sub>       | 3          |
|             | CGGAATGGCTCATCACGATC   |                     |                                   |            |
| TEM         | ATCAGCAATAAA CCAGC     | 52                  | <i>bla</i> <sub>TEM</sub>         | 4          |
|             | CCCCGAAGAACGTTTTTC     |                     |                                   |            |
| PER         | ATGAATGTCATTATAAAAGC   | 50                  | <i>bla</i> <sub>PER</sub>         | 5          |
|             | AATTTGGGCTTAGGGCAGAA   |                     |                                   |            |
| SHV         | AGGATTGACTGCCTTTTTG    | 52                  | <i>bla</i> <sub>SHV</sub>         | 4          |
|             | ATTTGCTGATTTTCGCTCG    |                     |                                   |            |
| VEB         | CAGTTTGAGCATTGGAATACAC | 55                  | <i>bla</i> <sub>VEB</sub>         | 5          |
|             | AGCGTATTTGTTGCAGAGTCC  |                     |                                   |            |
| KPC-1       | GCTACACCTAGCTCCACCTTC  | 64                  | <i>bla</i> <sub>KPC-1</sub>       | 6          |
|             | GACAGTGGTGGTAATCCATGC  |                     |                                   |            |
| KPC-2       | GGTGATTCAGGGTAAAGTGG   | 64                  | <i>bla</i> <sub>KPC-2</sub>       | 6          |
|             | GACAGTGGTGGTAATCCATGC  |                     |                                   |            |
| KPC-5       | TGCGCAACTGTTTTGTTCGAG  | 64                  | <i>bla</i> <sub>KPC-5</sub>       | This study |
|             | CGGCATAGTCATTTGCCGTG   |                     |                                   |            |
| KPC-10      | TGTGTACGCGATGGATACCG   | 64                  | <i>bla</i> <sub>KPC-10</sub>      | This study |
|             | TCCGGTTTTGTCTCCGACTG   |                     |                                   |            |
| CTX-M-1     | AAAATCACTGCGCCAGTTC    | 52                  | <i>bla</i> <sub>CTX-M-1</sub>     | 1          |
|             | AGCTTATTCATCGCCACGTT   |                     |                                   |            |
| CTX-M-2     | CGACGCTACCCCTGCTTT     | 52                  | <i>bla</i> <sub>CTX-M-2</sub>     | 1          |
|             | CCAGCGTC GATTTTTTCAGG  |                     |                                   |            |
| CTX-M-8     | TCGCGTTAAGCGGATGATGC   | 52                  | <i>bla</i> <sub>CTX-M-8</sub>     | 1          |
|             | AACCCACGATGTGGGTAGC    |                     |                                   |            |

|                    |                         |    |                                                 |    |
|--------------------|-------------------------|----|-------------------------------------------------|----|
| CTX-M-9            | CAAAGAGAGTGCAACGGATG    | 52 | <i>bla</i> <sub>CTX-M-9</sub>                   | 1  |
|                    | ATTGGAAAGCGTTCATCACC    |    |                                                 |    |
| CTX-M-25           | GCACGATGACATTCGGG       | 52 | <i>bla</i> <sub>CTX-M-25</sub>                  | 1  |
|                    | AACCCACGATGTGGGTAGC     |    |                                                 |    |
| ACD-7              | ATGCGATTTAAAAAATTTCTTGT | 52 | <i>bla</i> <sub>ADC-1-7</sub>                   | 7  |
|                    | TTATTTCTTTATTGCATTGAG   |    |                                                 |    |
| ampC               | AGTACCTCAATTTATGCGGGCA  | 52 | <i>bla</i> <sub>ampC</sub>                      | 8  |
|                    | TGCATTCAGCACAGCATAAGC   |    |                                                 |    |
| IS <sub>AbaI</sub> | CACGAATGCAGAAGTTG       | 52 | IS <sub>AbaI</sub>                              | 9  |
|                    | CGACGAATACTATGACAC      |    |                                                 |    |
| <i>int123</i>      | TGCGGGTYAARGATBTKGATTT  | 64 | Integrase gene<br>( <i>int</i> <sub>1-3</sub> ) | 10 |
|                    | CARCACATGCGTRTARAT      |    |                                                 |    |
| ICA-1              | TCATGGCTTGTTATGACTGT    | 55 | Integron Cassette<br>Array-1                    | 10 |
|                    | GTAGGGCTTATTATGCACGC    |    |                                                 |    |

## References

- 1) Woodford N. *Rapid characterization of beta-lactamases by multiplex PCR*. Methods Mol Biol 2010; 642: 181-92.
- 2) Bou, G., A. Oliver, and J. Martinez-Beltran. *OXA-24, a novel class D beta-lactamase with carbapenemase activity in an Acinetobacter baumannii clinical strain*. Antimicrob Agents Chemother, 2000. 44(6): p. 1556-61.
- 3) Poirel L, Walsh TR, Cuvillier V, Nordmann P. *Multiplex PCR for detection of acquired carbapenemase genes*. Diagn Microbiol Infect Dis 2011; 70: 119-23.
- 4) Colom, K., et al., *Simple and reliable multiplex PCR assay for detection of bla<sub>TEM</sub>, bla<sub>(SHV)</sub> and bla<sub>OXA-1</sub> genes in Enterobacteriaceae*. FEMS Microbiol Lett, 2003. 223(2): p. 147-51.
- 5) Naas, T., et al., *Emergence of PER and VEB extended-spectrum beta-lactamases in Acinetobacter baumannii in Belgium*. J Antimicrob Chemother, 2006. 58(1): p. 178-82.
- 6) Wolter, D.J., et al., *Phenotypic and enzymatic comparative analysis of the novel KPC variant KPC-5 and its evolutionary variants, KPC-2 and KPC-4*. Antimicrob Agents Chemother, 2009. 53(2): p. 557-62.
- 7) Hujer, K.M., et al., *Identification of a new allelic variant of the Acinetobacter baumannii cephalosporinase, ADC-7 beta-lactamase: defining a unique family of class C enzymes*. Antimicrob Agents Chemother, 2005. 49(7): p. 2941-8.
- 8) Ben RJ, Yang MC, Hsueh JC, Shiang JC, Chien ST. *Molecular characterization of multiple drug-resistant Acinetobacter baumannii isolates in southern Taiwan*. Int J Antimicrob Agents. 2011 Nov;38(5):403-08.
- 9) Segal H, Garny S, Elisha BG. 2005. *Is IS(ABA-1) customized for Acinetobacter?* FEMS microbiology letters 243:425-429.
- 10) White, P.A., et al., *Characterisation of two new gene cassettes, aadA5 and dfrA17*. FEMS Microbiol Lett, 2000. 182(2): p. 265-9.
