# Supplementary material for: Molecular characterization of β-lactamase genes in clinical isolates of carbapenem-resistant Acinetobacter baumannii
Source: PubMed Central journal article supplement (PMC5691885; doi:10.1186/s12941-017-0248-3), 2017-11-16
Supplement: 12941_2017_248_MOESM3_ESM.pdf [file 12941_2017_248_MOESM3_ESM.pdf]

**S3 Table.** Antimicrobial typing of *A. baumannii* study isolates, showing individual isolates against commonly used drugs.

| Isolate No. | Ampicillin/Sulbact | Imipinem | Meropenem | Amikacin | Levofloxacin | Gentamicin | Cefepime | Tobramicin | Trimeth-Sulfametho | Piperacilin |
|-------------|--------------------|----------|-----------|----------|--------------|------------|----------|------------|--------------------|-------------|
| 22          | R                  | R        | R         | SS       | R            | R          | R        | R          | R                  | R           |
| 25          | I                  | R        | R         | SS       | R            | R          | R        | R          | R                  | R           |
| 28          | SS                 | I        | I         | SS       | R            | SS         | SS       | SS         | R                  | R           |
| 32          | R                  | R        | R         | SS       | R            | R          | R        | R          | R                  | R           |
| 39          | R                  | R        | R         | SS       | R            | R          | R        | R          | R                  | R           |
| 42          | R                  | R        | R         | R        | R            | R          | R        | R          | R                  | R           |
| 51          | SS                 | R        | R         | SS       | R            | R          | R        | R          | R                  | SS          |
| 52          | SS                 | R        | R         | SS       | R            | R          | R        | R          | R                  | I           |
| 56          | R                  | R        | R         | R        | R            | R          | R        | R          | R                  | R           |
| 57          | I                  | I        | R         | SS       | R            | R          | R        | SS         | R                  | R           |
| 58          | R                  | R        | R         | R        | I            | R          | R        | R          | R                  | R           |
| 61          | R                  | R        | R         | R        | R            | R          | R        | R          | SS                 |             |
| 62          | R                  | R        | R         | R        | R            | R          | R        | R          | R                  | R           |
| 64          | SS                 | R        | R         | R        | R            | R          | R        | R          | R                  | R           |
| 65          | SS                 | R        | R         | R        | R            | R          | R        | R          | R                  | R           |
| 68          | I                  | R        | R         | R        | R            | R          | R        | SS         | R                  | R           |
| 220         | SS                 | R        | R         | R        | R            | SS         | I        | SS         | R                  | R           |
| 222         | I                  | R        | R         | R        | R            | R          | R        | SS         | R                  | R           |
| 223         | I                  | R        | R         | R        | R            | R          | R        | SS         | R                  | R           |
| 224         | SS                 | R        | R         | R        | R            | R          | R        | I          | R                  | R           |
| 225         | I                  | R        | R         | R        | R            | SS         | R        | SS         | SS                 | R           |
| 226         | SS                 | R        | R         | I        | R            | SS         | I        | SS         | R                  | R           |
| 229         | SS                 | R        | R         | R        | R            | R          | R        | SS         | R                  | R           |
| 231         | I                  | R        | R         | R        | R            | R          | R        | SS         | R                  | R           |
| 232         | I                  | R        | R         | R        | R            | R          | R        | SS         | R                  | R           |
| 235         | I                  | R        | R         | I        | R            | SS         | R        | SS         | R                  | R           |
